# Supplementary material for: Deposition of Histone Variant H2A.Z within Gene Bodies Regulates Responsive Genes
Source: PLoS Genet. 2012 Oct 11;8(10):e1002988. doi: 10.1371/journal.pgen.1002988 (PMC3469445; doi:10.1371/journal.pgen.1002988)
Supplement: Table S3 — Overrepresented GO terms in upregulated genes in the h2a.z mutant. List of all overrepresented GO Terms in the 1800 upregulated genes in the h2a.z mutant, as determined by DAVID using the GO Term BP FAT Ontology Categories. From left to right are the GO Term ID, GO Term, Fold Enrichment, P-Value, Gene Count, and the percentage that Gene Count is out of the total number of upregulated genes. Shown in bold are all of the GO Terms with “response” in their name. (XLS) [file pgen.1002988.s024.xls]

## Sheet: Sheet1
Table S3. Overrepresented GO terms in upregulated genes in the h2a.z mutant
GO Term ID	GO Term	Fold Enrichment	P-value	Gene Count	%
GO:0010033	response to organic substance	1.8231	6.91638e-14	155	8.61111
GO:0009611	response to wounding	3.66972	2.36321e-12	39	2.16667
GO:0009414	response to water deprivation	3.30082	1.23486e-11	42	2.33333
GO:0006955	immune response	2.69087	1.26693e-11	57	3.16667
GO:0009415	response to water	3.21501	1.69527e-11	43	2.38889
GO:0010200	response to chitin	3.59415	2.62706e-10	33	1.83333
GO:0009628	response to abiotic stimulus	1.664	5.68672e-10	144	8
GO:0009737	response to abscisic acid stimulus	2.52374	1.20061e-09	52	2.88889
GO:0006952	defense response	1.7055	1.60878e-09	127	7.05556
GO:0009743	response to carbohydrate stimulus	2.84981	2.43924e-09	41	2.27778
GO:0045087	innate immune response	2.46461	8.55065e-09	49	2.72222
GO:0009617	response to bacterium	2.4943	3.8336e-08	44	2.44444
GO:0009266	response to temperature stimulus	2.18812	4.82927e-08	56	3.11111
GO:0042742	defense response to bacterium	2.63109	3.2104e-07	35	1.94444
GO:0006970	response to osmotic stress	2.01067	5.06187e-07	58	3.22222
GO:0009719	response to endogenous stimulus	1.58891	7.2742e-07	112	6.22222
GO:0009651	response to salt stress	1.98671	2.42391e-06	53	2.94444
GO:0009753	response to jasmonic acid stimulus	2.57134	6.21299e-06	29	1.61111
GO:0009723	response to ethylene stimulus	2.16125	6.98376e-06	40	2.22222
GO:0016265	death	2.12381	1.396e-05	39	2.16667
GO:0008219	cell death	2.12381	1.396e-05	39	2.16667
GO:0009725	response to hormone stimulus	1.52167	1.98043e-05	100	5.55556
GO:0009409	response to cold	2.13714	2.76354e-05	36	2
GO:0009408	response to heat	2.61392	3.53118e-05	24	1.33333
GO:0006468	protein amino acid phosphorylation	1.45463	4.13142e-05	112	6.22222
GO:0006793	phosphorus metabolic process	1.40057	5.77132e-05	129	7.16667
GO:0006796	phosphate metabolic process	1.40167	5.83341e-05	129	7.16667
GO:0009738	abscisic acid mediated signaling	3.17763	6.07865e-05	17	0.944444
GO:0042430	indole and derivative metabolic process	3.952	0.000140981	12	0.666667
GO:0042434	indole derivative metabolic process	3.952	0.000140981	12	0.666667
GO:0012501	programmed cell death	2.04689	0.000145399	33	1.83333
GO:0042435	indole derivative biosynthetic process	4.11222	0.000212846	11	0.611111
GO:0009873	ethylene mediated signaling pathway	2.19685	0.000213823	27	1.5
GO:0009755	hormone-mediated signaling	1.66496	0.000339472	52	2.88889
GO:0032870	cellular response to hormone stimulus	1.66496	0.000339472	52	2.88889
GO:0009751	response to salicylic acid stimulus	2.21312	0.000466118	24	1.33333
GO:0009814	defense response, incompatible interaction	2.5935	0.000469595	18	1
GO:0016310	phosphorylation	1.35032	0.000634738	115	6.38889
GO:0002252	immune effector process	4.81114	0.000880932	8	0.444444
GO:0000160	two-component signal transduction system (phosphorelay)	1.90349	0.00102284	30	1.66667
GO:0010604	positive regulation of macromolecule metabolic process	2.8065	0.00117096	14	0.777778
GO:0006790	sulfur metabolic process	2.02222	0.00128555	25	1.38889
GO:0009615	response to virus	3.54667	0.00151676	10	0.555556
GO:0006979	response to oxidative stress	1.73503	0.00158526	36	2
GO:0010557	positive regulation of macromolecule biosynthetic process	2.85423	0.00162144	13	0.722222
GO:0051607	defense response to virus	5.09601	0.00167453	7	0.388889
GO:0019748	secondary metabolic process	1.56959	0.00205251	48	2.66667
GO:0034976	response to endoplasmic reticulum stress	5.92801	0.00224506	6	0.333333
GO:0007242	intracellular signaling cascade	1.3832	0.00275497	79	4.38889
GO:0031328	positive regulation of cellular biosynthetic process	2.64436	0.00317411	13	0.722222
GO:0009891	positive regulation of biosynthetic process	2.64436	0.00317411	13	0.722222
GO:0019438	aromatic compound biosynthetic process	1.80138	0.00343678	28	1.55556
GO:0009626	plant-type hypersensitive response	3.07378	0.00429606	10	0.555556
GO:0034050	host programmed cell death induced by symbiont	3.00696	0.00500638	10	0.555556
GO:0006350	transcription	1.25554	0.00610641	119	6.61111
GO:0006915	apoptosis	1.84963	0.00628089	23	1.27778
GO:0010193	response to ozone	3.87296	0.00753099	7	0.388889
GO:0006972	hyperosmotic response	2.82286	0.00769156	10	0.555556
GO:0042538	hyperosmotic salinity response	2.964	0.00939344	9	0.5
GO:0044272	sulfur compound biosynthetic process	2.06834	0.00983504	16	0.888889
GO:0042343	indole glucosinolate metabolic process	7.90401	0.0105443	4	0.222222
GO:0006575	cellular amino acid derivative metabolic process	1.5808	0.0114922	32	1.77778
GO:0045859	regulation of protein kinase activity	3.458	0.0133171	7	0.388889
GO:0043549	regulation of kinase activity	3.458	0.0133171	7	0.388889
GO:0051173	positive regulation of nitrogen compound metabolic process	2.41511	0.0142295	11	0.611111
GO:0045935	positive regulation of nucleobase, nucleoside, nucleotide and nucleic acid metabolic process	2.41511	0.0142295	11	0.611111
GO:0043405	regulation of MAP kinase activity	13.832	0.0148834	3	0.166667
GO:0046283	anthocyanin metabolic process	4.94001	0.0150785	5	0.277778
GO:0009625	response to insect	4.94001	0.0150785	5	0.277778
GO:0002213	defense response to insect	6.91601	0.0159735	4	0.222222
GO:0052317	camalexin metabolic process	6.91601	0.0159735	4	0.222222
GO:0010120	camalexin biosynthetic process	6.91601	0.0159735	4	0.222222
GO:0045941	positive regulation of transcription	2.51491	0.0161882	10	0.555556
GO:0016311	dephosphorylation	2.14067	0.0171449	13	0.722222
GO:0010628	positive regulation of gene expression	2.47	0.018092	10	0.555556
GO:0009070	serine family amino acid biosynthetic process	3.22747	0.018566	7	0.388889
GO:0009812	flavonoid metabolic process	2.42667	0.0201534	10	0.555556
GO:0051338	regulation of transferase activity	3.12336	0.021656	7	0.388889
GO:0006355	regulation of transcription, DNA-dependent	1.23205	0.0226329	97	5.38889
GO:0009700	indole phytoalexin biosynthetic process	6.14756	0.0226908	4	0.222222
GO:0052314	phytoalexin metabolic process	6.14756	0.0226908	4	0.222222
GO:0046217	indole phytoalexin metabolic process	6.14756	0.0226908	4	0.222222
GO:0042431	indole metabolic process	6.14756	0.0226908	4	0.222222
GO:0052315	phytoalexin biosynthetic process	6.14756	0.0226908	4	0.222222
GO:0042398	cellular amino acid derivative biosynthetic process	1.63988	0.0234217	23	1.27778
GO:0051252	regulation of RNA metabolic process	1.2253	0.0249948	97	5.38889
GO:0009627	systemic acquired resistance	3.02575	0.0250751	7	0.388889
GO:0030001	metal ion transport	1.53689	0.02552	28	1.55556
GO:0009759	indole glucosinolate biosynthetic process	10.374	0.0283451	3	0.166667
GO:0009069	serine family amino acid metabolic process	2.44094	0.0286693	9	0.5
GO:0042325	regulation of phosphorylation	2.93406	0.0288358	7	0.388889
GO:0010038	response to metal ion	1.40481	0.029303	39	2.16667
GO:0042440	pigment metabolic process	1.91731	0.0296126	14	0.777778
GO:0009718	anthocyanin biosynthetic process	5.53281	0.0307051	4	0.222222
GO:0006816	calcium ion transport	3.31968	0.0307732	6	0.333333
GO:0046686	response to cadmium ion	1.43819	0.0317737	34	1.88889
GO:0016138	glycoside biosynthetic process	2.23097	0.0330463	10	0.555556
GO:0009813	flavonoid biosynthetic process	2.34883	0.0351935	9	0.5
GO:0033554	cellular response to stress	1.36372	0.0361967	42	2.33333
GO:0007568	aging	2.08428	0.0363307	11	0.611111
GO:0052543	callose deposition in cell wall	3.84223	0.0366351	5	0.277778
GO:0019757	glycosinolate metabolic process	2.51491	0.036836	8	0.444444
GO:0019760	glucosinolate metabolic process	2.51491	0.036836	8	0.444444
GO:0016143	S-glycoside metabolic process	2.51491	0.036836	8	0.444444
GO:0016137	glycoside metabolic process	1.976	0.0387417	12	0.666667
GO:0009696	salicylic acid metabolic process	5.02982	0.040001	4	0.222222
GO:0006457	protein folding	1.48791	0.0400591	27	1.5
GO:0019220	regulation of phosphate metabolic process	2.68956	0.04227	7	0.388889
GO:0051174	regulation of phosphorus metabolic process	2.68956	0.04227	7	0.388889
GO:0006855	multidrug transport	2.0287	0.0426478	11	0.611111
GO:0052386	cell wall thickening	3.64	0.0438343	5	0.277778
GO:0009130	pyrimidine nucleoside monophosphate biosynthetic process	8.29921	0.0449999	3	0.166667
GO:0009314	response to radiation	1.32007	0.0452863	46	2.55556
GO:0046148	pigment biosynthetic process	1.90786	0.0481471	12	0.666667
GO:0010224	response to UV-B	2.35439	0.0502496	8	0.444444
GO:0009631	cold acclimation	3.458	0.0517676	5	0.277778
GO:0052545	callose localization	3.458	0.0517676	5	0.277778
GO:0019758	glycosinolate biosynthetic process	2.8618	0.0543191	6	0.333333
GO:0019761	glucosinolate biosynthetic process	2.8618	0.0543191	6	0.333333
GO:0016144	S-glycoside biosynthetic process	2.8618	0.0543191	6	0.333333
GO:0009698	phenylpropanoid metabolic process	1.58318	0.0544171	19	1.05556
GO:0033037	polysaccharide localization	3.29334	0.0604285	5	0.277778
GO:0009911	positive regulation of flower development	2.7664	0.0614697	6	0.333333
GO:0015893	drug transport	1.9019	0.0615959	11	0.611111
GO:0045449	regulation of transcription	1.12078	0.0639405	164	9.11111
GO:0009129	pyrimidine nucleoside monophosphate metabolic process	6.91601	0.0643172	3	0.166667
GO:0043255	regulation of carbohydrate biosynthetic process	6.91601	0.0643172	3	0.166667
GO:0032270	positive regulation of cellular protein metabolic process	6.91601	0.0643172	3	0.166667
GO:0010050	vegetative phase change	6.91601	0.0643172	3	0.166667
GO:0051247	positive regulation of protein metabolic process	6.91601	0.0643172	3	0.166667
GO:0042493	response to drug	1.87842	0.0659477	11	0.611111
GO:0048507	meristem development	1.80418	0.0670524	12	0.666667
GO:0006470	protein amino acid dephosphorylation	1.94817	0.0687137	10	0.555556
GO:0042362	fat-soluble vitamin biosynthetic process	3.952	0.0751575	4	0.222222
GO:0006775	fat-soluble vitamin metabolic process	3.952	0.0751575	4	0.222222
GO:0033674	positive regulation of kinase activity	3.952	0.0751575	4	0.222222
GO:0045860	positive regulation of protein kinase activity	3.952	0.0751575	4	0.222222
GO:0046395	carboxylic acid catabolic process	1.83316	0.0752281	11	0.611111
GO:0016054	organic acid catabolic process	1.83316	0.0752281	11	0.611111
GO:0009699	phenylpropanoid biosynthetic process	1.62094	0.0780697	15	0.833333
GO:0009416	response to light stimulus	1.27634	0.07995	43	2.38889
GO:0006811	ion transport	1.26256	0.0845636	45	2.5
GO:0006984	ER-nuclear signaling pathway	5.92801	0.0858263	3	0.166667
GO:0010189	vitamin E biosynthetic process	5.92801	0.0858263	3	0.166667
GO:0042360	vitamin E metabolic process	5.92801	0.0858263	3	0.166667
GO:0051094	positive regulation of developmental process	2.25172	0.0868868	7	0.388889
GO:0006357	regulation of transcription from RNA polymerase II promoter	2.88167	0.0906304	5	0.277778
